# Supplementary material
Source: PubMed Central journal article supplement (PMC7895299)
Supplement: NIHMS1666098-supplement-table_s1.pdf [file NIHMS1666098-supplement-table_s1.pdf]

**Table S1. Characteristics of the Images of Patients with Retinopathy of Prematurity (ROP) used for the Clinical Cases ROP Tele-education System.**

| <b>Diagnosis</b>    | <b>Eyes Included in the Unique Cases of the Pretest and Posttest (N=32)</b> | <b>Eyes Included in the Repeated Cases of the Pretest and Posttest (N=8)</b> | <b>Eyes Included in the Training Chapter Cases (N=50)</b> |
|---------------------|-----------------------------------------------------------------------------|------------------------------------------------------------------------------|-----------------------------------------------------------|
| <b>Zone</b>         |                                                                             |                                                                              |                                                           |
| I                   | 4                                                                           | 2                                                                            | 15                                                        |
| II                  | 28                                                                          | 6                                                                            | 35                                                        |
| III                 | 0                                                                           | 0                                                                            | 0                                                         |
| <b>Stage</b>        |                                                                             |                                                                              |                                                           |
| 0                   | 10                                                                          | 2                                                                            | 10                                                        |
| 1                   | 3                                                                           | 2                                                                            | 11                                                        |
| 2                   | 4                                                                           | 0                                                                            | 10                                                        |
| 3                   | 15                                                                          | 4                                                                            | 19                                                        |
| 4                   | 0                                                                           | 0                                                                            | 0                                                         |
| 5                   | 0                                                                           | 0                                                                            | 0                                                         |
| <b>Category</b>     |                                                                             |                                                                              |                                                           |
| None                | 10                                                                          | 2                                                                            | 10                                                        |
| Mild                | 6                                                                           | 2                                                                            | 13                                                        |
| Type-2 ROP          | 10                                                                          | 2                                                                            | 15                                                        |
| Treatment-requiring | 6                                                                           | 2                                                                            | 12                                                        |
| APROP               | 2                                                                           | 0                                                                            | 8                                                         |

ROP, retinopathy of prematurity; APROP, aggressive posterior retinopathy of prematurity.
