# Supplementary material
Source: PubMed Central journal article supplement (PMC7895299)
Supplement: NIHMS1666098-supplement-table_s2.pdf [file NIHMS1666098-supplement-table_s2.pdf]

**Table S2. Characteristics of the 58 International Ophthalmologists-in-training Who Participated in the Study**

|                                             | Intervention Group | Control Group (only pretest and posttest) |
|---------------------------------------------|--------------------|-------------------------------------------|
| Number of trainees consented to participate | 29                 | 29                                        |
| Number of trainees who completed program    | 26                 | 26                                        |
| Age (years)                                 |                    |                                           |
| Mean $\pm$ SD (range)                       | 27.4 (1.45)        | 27.5 (1.79)                               |
| Gender                                      |                    |                                           |
| Male, n (%)                                 | 12 (46%)           | 8 (31%)                                   |
| Female, n (%)                               | 14                 | 18                                        |
| Training level                              |                    |                                           |
| PGY-1                                       | 6                  | 8                                         |
| PGY-2                                       | 8                  | 7                                         |
| PGY-3                                       | 7                  | 8                                         |
| Fellow (Retina)                             | 5                  | 3                                         |

SD, standard deviation; PGY, post graduate year.
